# Supplementary material
Source: Springer Nature journal article supplement (http://www.springermedizin.de/resource/supplementary/12872_2012_544_MOESM2_ESM.pdf/9429958)

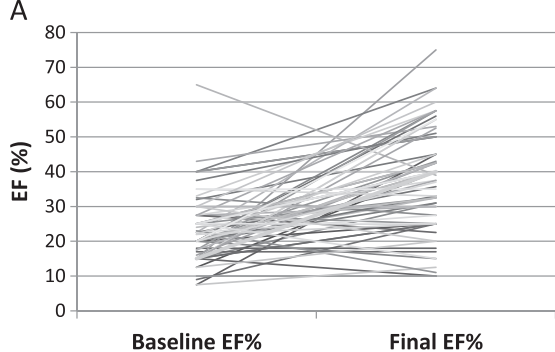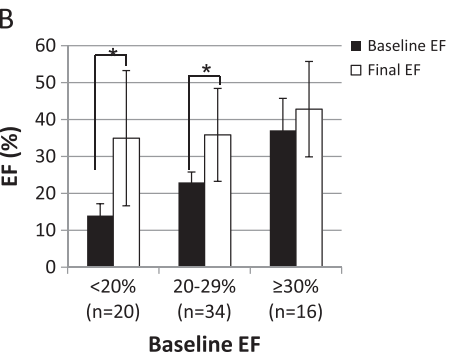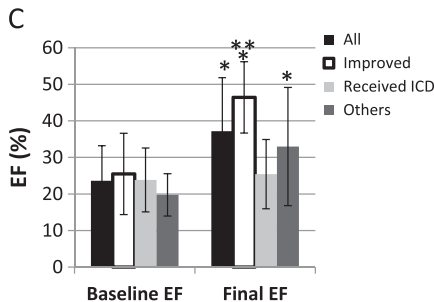

Supplement: MOESM2 [file 9429958]
